# Supplementary material for: High-performance dynamic random access memory capacitor with an equivalent oxide thickness of 0.31 nm via stepwise cycling in Y-doped Hf 0.5 Zr 0.5 O 2 thin films
Source: Royal Society of Chemistry journal article supplement (doi:10.1039/d5mh01563d), 2025-11-07
Supplement: d5mh01563d1.pdf [file d5mh01563d1.pdf]

Electronic Supplementary Information (ESI) for Material Horizons.  
This journal is © The Royal Society of Chemistry 2025

# Electronic Supporting Information

## High-Performance Dynamic Random Access Memory Capacitor with an Equivalent Oxide Thickness of 0.31 nm via Stepwise Cycling in Y-doped $\text{Hf}_{0.5}\text{Zr}_{0.5}\text{O}_2$ Thin Films

Jonghoon Shin,<sup>a</sup> Haengha Seo,<sup>a</sup> Janguk Han,<sup>a</sup> Tae Kyun Kim,<sup>a</sup> Heewon Paik,<sup>a</sup> Haewon Song,<sup>a</sup>  
Hansub Yoon,<sup>a</sup> Han Sol Park,<sup>a</sup> Kyung Do Kim,<sup>a</sup> Seong Jae Shin,<sup>a</sup> Jae Hee Song,<sup>a</sup> Sanghyup  
Lee,<sup>a</sup> Seungheon Choi,<sup>a</sup> Dong Hoon Shin,<sup>a</sup> Juneseong Choi,<sup>a</sup> and Cheol Seong Hwang<sup>\*a</sup>

<sup>a</sup> Department of Materials Science and Engineering, and Inter-University Semiconductor  
Research Center, Seoul National University, Seoul, 08826, Republic of Korea.

\* Corresponding author (e-mail: *cheolsh@snu.ac.kr*)

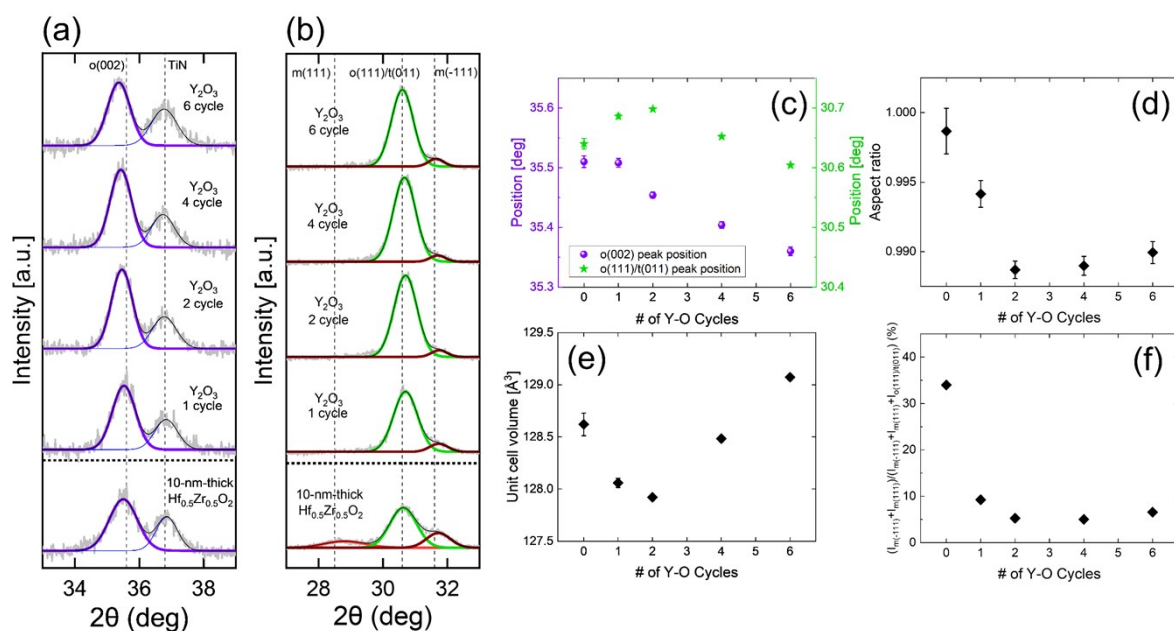

**Figure S1.** Background-subtracted GIXRD (incident angle:  $0.5^\circ$ ) patterns (grey) of  $\sim 10$ -nm-thick  $\text{Hf}_{0.5}\text{Zr}_{0.5}\text{O}_2$  films with varying numbers of  $\text{Y}_2\text{O}_3$  IL ALD cycles inserted in the middle for (a)  $\text{o}(002)$  (purple) and  $\text{TiN}$  (blue) peaks (b)  $\text{o}(111)/\text{t}(011)$  (green),  $\text{m}(111)$  (red) and  $\text{m}(-111)$  (brown) peaks, and the cumulative results for the mentioned peaks (black), respectively. The (c) peak positions, (d) aspect ratio, (e) unit cell volume, and (f) m-phase areal ratio of the films. Error bars are included for the peak positions from the standard deviation of the Gaussian fitting. Error bars of the aspect ratio and unit cell volume are estimated from the error of the peak positions of the  $\text{o}(002)$  and  $\text{o}(111)/\text{t}(011)$  peaks. Reproduced with permission.<sup>1</sup> Copyright 2024, Royal Society of Chemistry.

Figure S1a,b show the background-subtracted GIXRD patterns and the Gaussian deconvoluted curves of  $\sim 10$ -nm-thick  $\text{Hf}_{0.5}\text{Zr}_{0.5}\text{O}_2$  films with varying numbers of  $\text{Y}_2\text{O}_3$  IL ALD cycles (zero, one, two, four, and six) inserted at the middle of the films after PMA at  $525^\circ\text{C}$  for 30 seconds. Figure S1c shows the  $2\theta$  shifts of the deconvoluted  $\text{o}(002)$  and  $\text{o}(111)/\text{t}(011)$  peaks. According to Bragg's law, a decrease (or increase) in  $2\theta$  corresponds to an increase (or decrease) in the interplanar spacing. The  $\text{o}(002)$  peaks shifted monotonically to lower  $2\theta$  values with increasing  $\text{Y}_2\text{O}_3$  IL cycles, attributed to the substitutional diffusion of larger  $\text{Y}^{3+}$  ions (90 pm) into the smaller  $\text{Hf}^{4+}$  and  $\text{Zr}^{4+}$  sites (72 pm), resulting in lattice expansion.<sup>1</sup> In contrast, the  $\text{o}(111)/\text{t}(011)$  peak shifted to higher  $2\theta$  values up to two ALD cycles, but decreased

monotonically at higher cycles, similar to the o(002) peak. Previous studies extensively reported that the  $2\theta$  position of the o(111)/t(011) peak is influenced not only by dopant-induced lattice expansion (or contraction), but also by variations in the relative phase fractions of the t- and PO-phases.<sup>1-5</sup> An increased t-phase (and decreased PO-phase) shifts this peak toward higher  $2\theta$  values<sup>1-5</sup>, which may explain the observed discrepancy.

To confirm this, the AR and unit cell volume were presented in Figure S1d,e, respectively, calculated from the interplanar spacings  $d_{111}$  and  $d_{002}$  of the o(111)/t(011) and o(002) peaks, assuming negligible differences in the two shorter lattice constants. Further details regarding the calculation and assumptions can be found in previous studies.<sup>1, 5, 6</sup> The AR values decreased from zero to two  $\text{Y}_2\text{O}_3$  ALD cycles, indicating the increased t-phase. At higher cycles, the AR values saturated, as Y diffusion was limited to regions near the IL and could not influence the phase changes in regions farther from the IL. The unit cell volume decreased up to two cycles but increased at higher cycles. This trend is attributed to the combined effects of phase transition and dopant-induced lattice expansion. At lower cycles, the reduction in unit cell volume was primarily driven by the increased t-phase. In contrast, at higher cycles, lattice expansion due to substitutional Y diffusion became dominant, as the phase transition effect had already saturated.<sup>1</sup>

Figure S1f shows the relative m-phase fraction changes calculated from  $(I_{m(-111)} + I_{m(111)}) / (I_{m(-111)} + I_{m(111)} + I_{o(111)/t(011)})$ , where  $I_{x(hkl)}$  denotes the areal intensity of the x(hkl) peak in the GIXRD pattern. Due to the higher PMA temperature (525 °C) in the previous study, the 10-nm-thick  $\text{Hf}_{0.5}\text{Zr}_{0.5}\text{O}_2$  displayed a significant m-phase areal fraction of ~34%. In contrast, the  $\text{Y}_2\text{O}_3$  inserted films exhibited a decreased m-phase areal fraction of ~5-13%.<sup>1</sup>

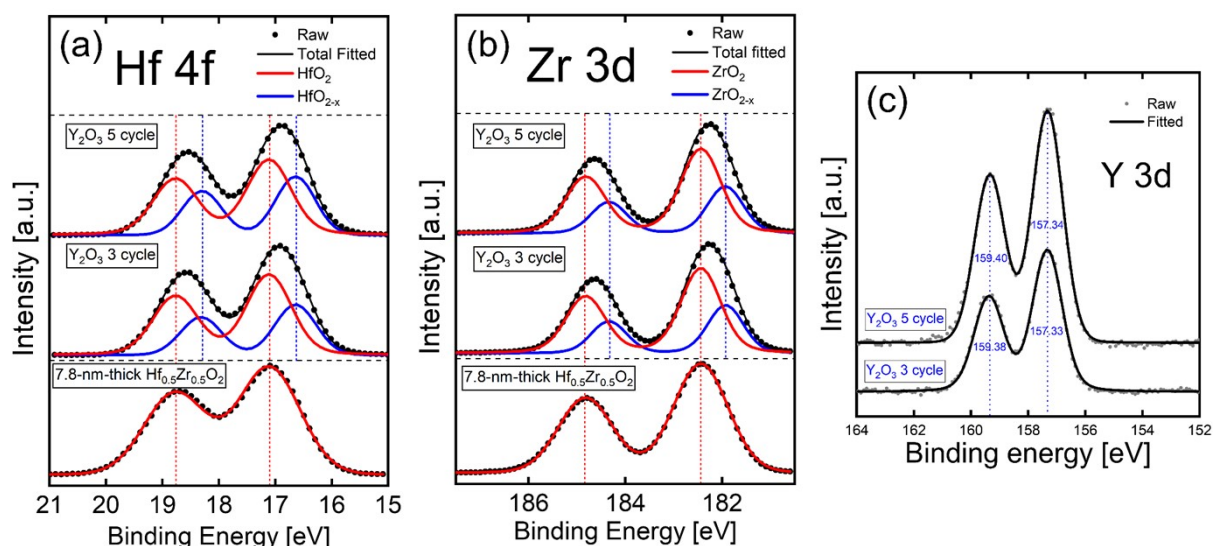

**Figure S2.** The (a) Hf 4f, (b) Zr 3d, and (c) Y 3d XPS spectra of the undoped 7.8-nm-thick  $\text{Hf}_{0.5}\text{Zr}_{0.5}\text{O}_2$  and  $\sim 7.8$ -nm-thick  $\text{Hf}_{0.5}\text{Zr}_{0.5}\text{O}_2$  with three and five ALD cycles of  $\text{Y}_2\text{O}_3$  inserted in the middle of the film. Reproduced with permission.<sup>1</sup> Copyright 2024, Royal Society of Chemistry.

The undoped 7.8-nm-thick  $\text{Hf}_{0.5}\text{Zr}_{0.5}\text{O}_2$  film and those with three and five ALD cycles of  $\text{Y}_2\text{O}_3$  inserted at the middle were analyzed by XPS. The Hf 4f and Zr 3d spectra of the Y-doped films shifted to lower binding energies compared to the undoped film. Deconvolution revealed increased fractions of oxygen-deficient phases ( $\text{HfO}_{2-x}$  and  $\text{ZrO}_{2-x}$ ), attributed to the substitutional diffusion of  $\text{Y}^{3+}$  ions into the  $\text{Hf}^{4+}$  and  $\text{Zr}^{4+}$ , generating  $\text{V}_\text{O}^{2+}$  to maintain charge neutrality.<sup>1</sup> The Y 3p spectra showed similar binding energies for both three and five  $\text{Y}_2\text{O}_3$  cycles. Previous studies reported that slightly oxygen-deficient conditions can stabilize the t-phase in  $\text{HfO}_2$ -based thin films<sup>1, 7-11</sup>, consistent with the behavior observed in the Y-diffused samples.

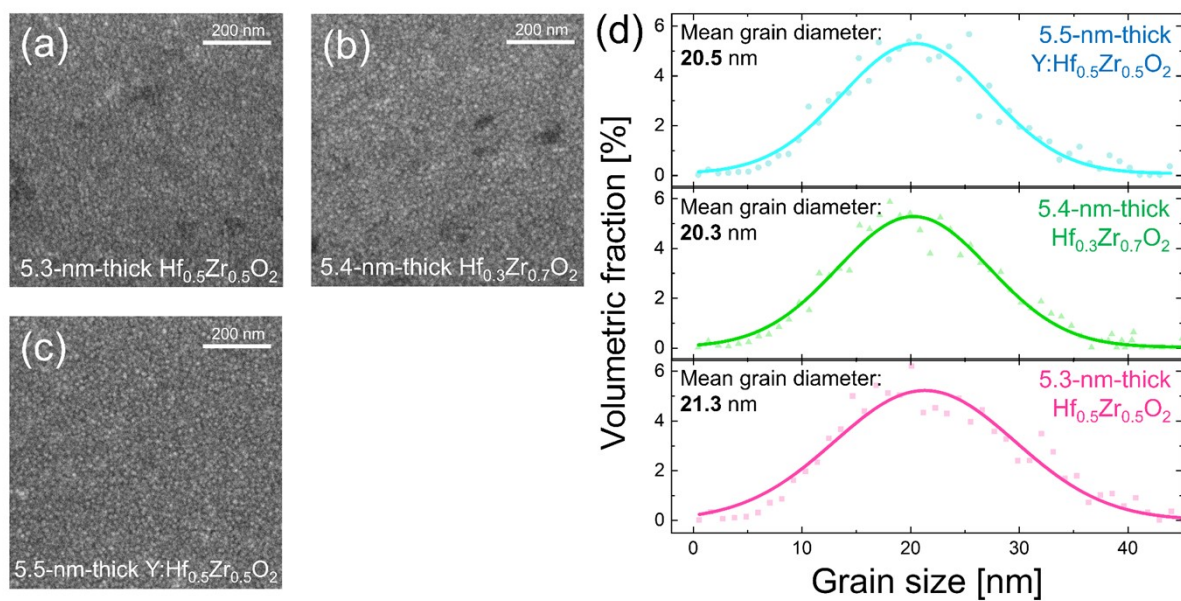

**Figure S3.** The SEM images of the (a) 5.3-nm-thick  $\text{Hf}_{0.5}\text{Zr}_{0.5}\text{O}_2$ , (b) 5.4-nm-thick  $\text{Hf}_{0.3}\text{Zr}_{0.7}\text{O}_2$ , and (c) 5.5-nm-thick  $\text{Y:Hf}_{0.5}\text{Zr}_{0.5}\text{O}_2$  films after PDA. (d) Grain diameter distributions and the mean grain diameter of the films analyzed with the watershed method implemented in the Gwyddion software.

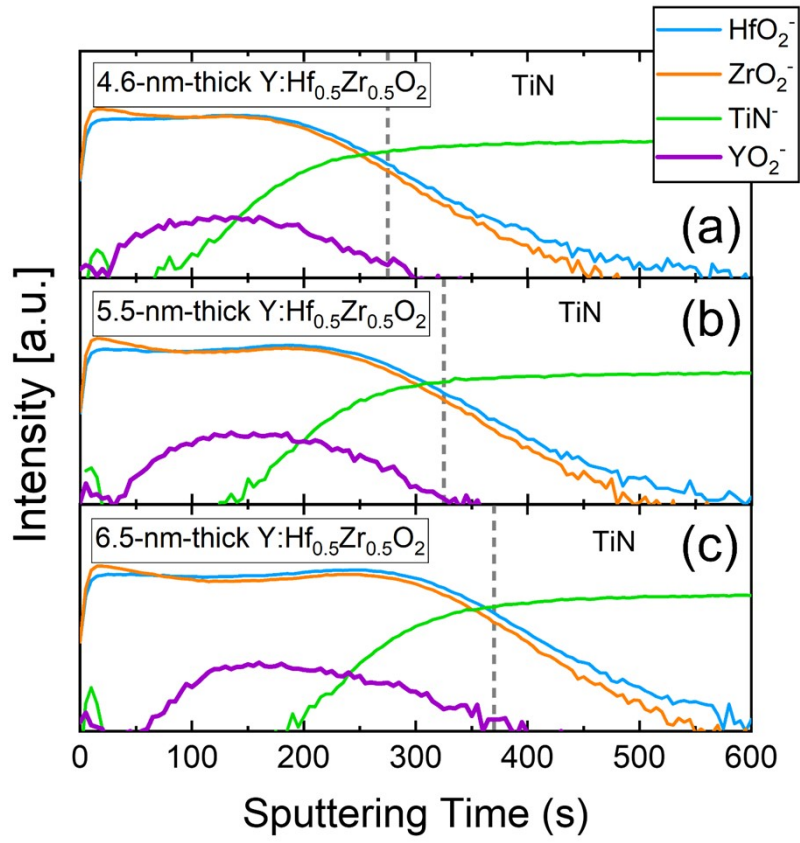

**Figure S4.** ToF-SIMS depth profiles of the (a) 4.6-nm, (b) 5.5-nm, and (c) 6.5-nm-thick Y:Hf<sub>0.5</sub>Zr<sub>0.5</sub>O<sub>2</sub> films on TiN bottom electrode after PDA.

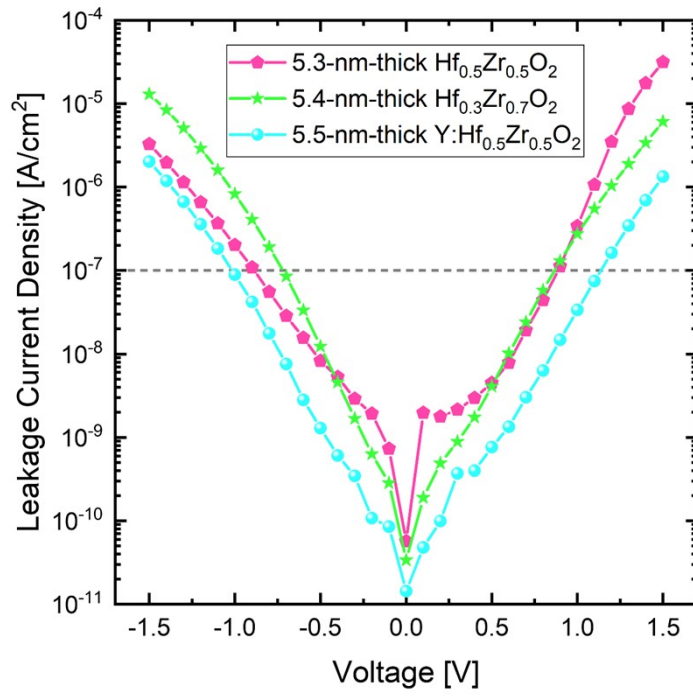

**Figure S5.** J-V curves of the 5.3-nm-thick  $\text{Hf}_{0.5}\text{Zr}_{0.5}\text{O}_2$ , 5.4-nm-thick  $\text{Hf}_{0.3}\text{Zr}_{0.7}\text{O}_2$ , and 5.5-nm-thick  $\text{Y:Hf}_{0.5}\text{Zr}_{0.5}\text{O}_2$  films at the pristine state.

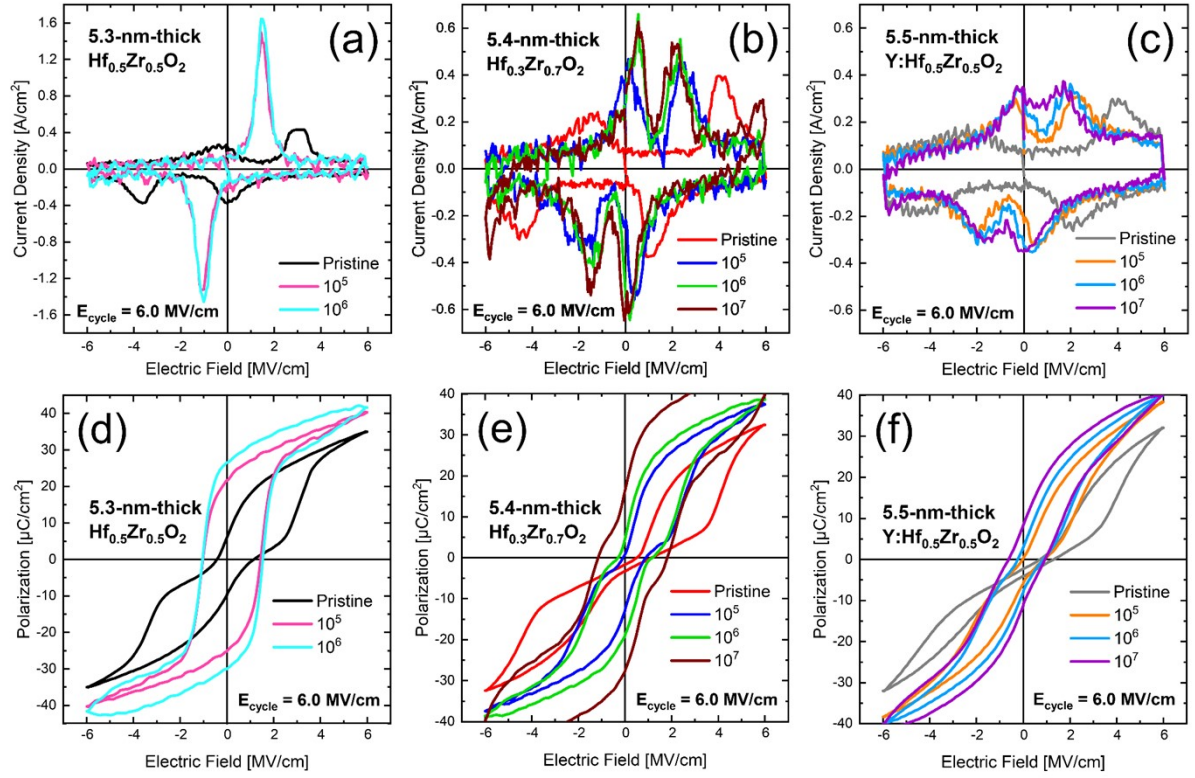

**Figure S6.** I-E curve changes of the (a) 5.3-nm-thick  $\text{Hf}_{0.5}\text{Zr}_{0.5}\text{O}_2$ , (b) 5.4-nm-thick  $\text{Hf}_{0.3}\text{Zr}_{0.7}\text{O}_2$ , and (c) 5.5-nm-thick  $\text{Y:Hf}_{0.5}\text{Zr}_{0.5}\text{O}_2$  films with field-cycling at  $6.0 \text{ MV cm}^{-1}$ . P-E curve changes of the (d) 5.3-nm-thick  $\text{Hf}_{0.5}\text{Zr}_{0.5}\text{O}_2$ , (e) 5.4-nm-thick  $\text{Hf}_{0.3}\text{Zr}_{0.7}\text{O}_2$ , and (f) 5.5-nm-thick  $\text{Y:Hf}_{0.5}\text{Zr}_{0.5}\text{O}_2$  films with field-cycling at  $6.0 \text{ MV cm}^{-1}$ .



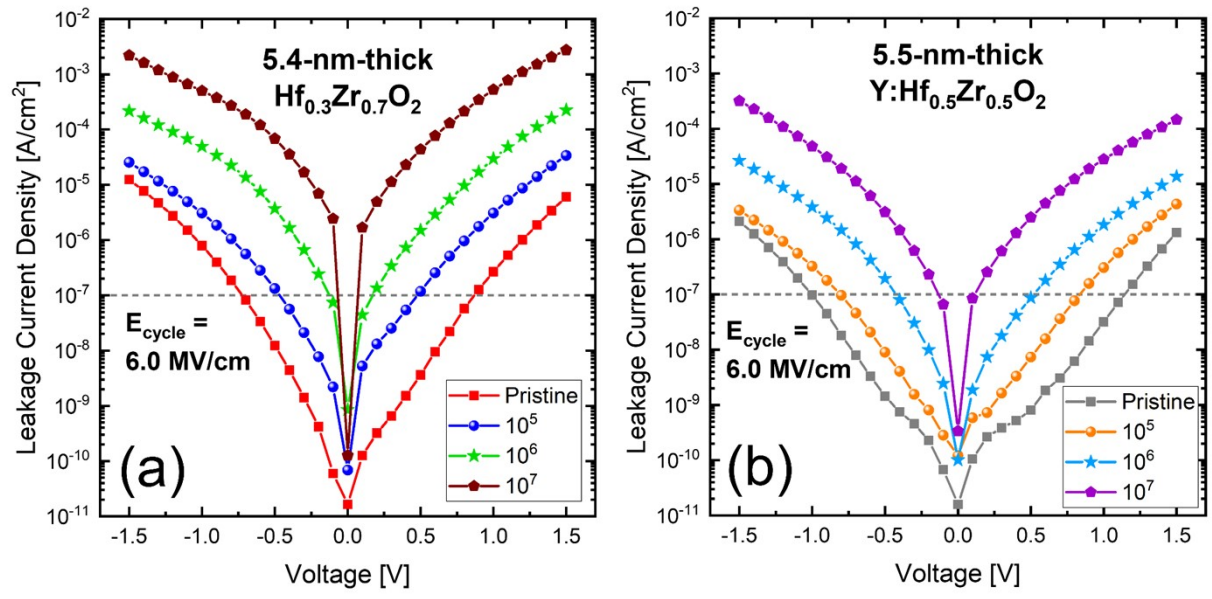

**Figure S7.** J-V curve changes of the (a) 5.4-nm-thick  $\text{Hf}_{0.3}\text{Zr}_{0.7}\text{O}_2$  and (b) 5.5-nm-thick  $\text{Y:Hf}_{0.5}\text{Zr}_{0.5}\text{O}_2$  films with field-cycling at  $6.0 \text{ MV cm}^{-1}$ .

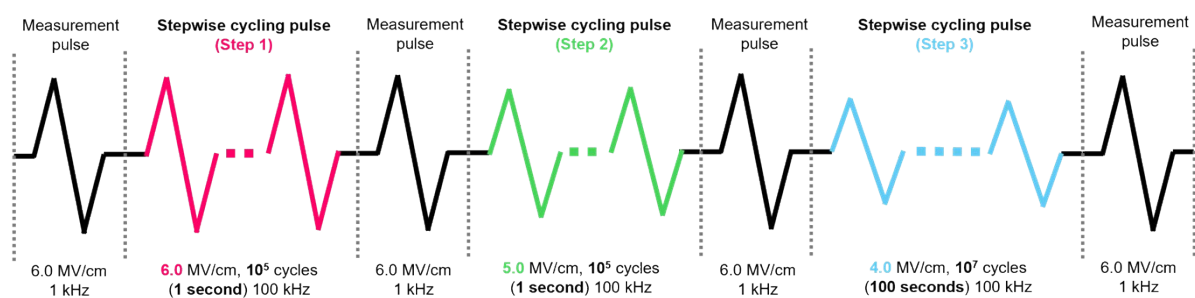

**Figure S8.** The schematic diagram of the pulse sequences for the stepwise cycling conducted in Figure 4(a)-(d).

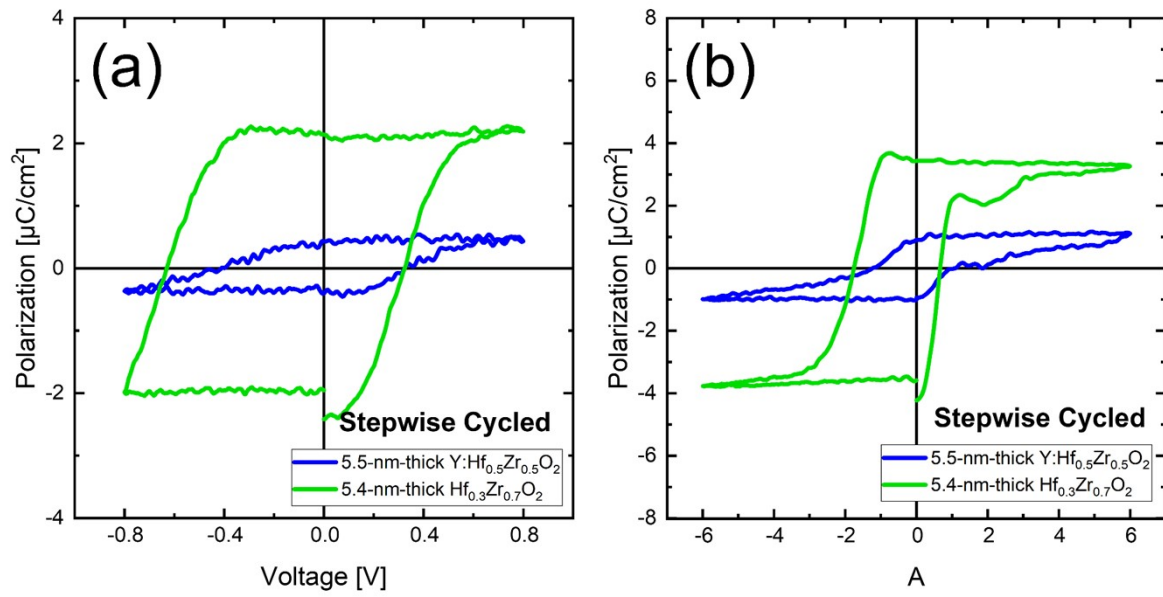

**Figure S9.** PUND P-V curves of the 5.4-nm-thick Hf<sub>0.3</sub>Zr<sub>0.7</sub>O<sub>2</sub> and 5.5-nm-thick Y:Hf<sub>0.5</sub>Zr<sub>0.5</sub>O<sub>2</sub> films after stepwise cycling, adopting (a) 0.8 V and (b) 6 MV cm<sup>-1</sup> triangular pulses, respectively, with 1 kHz frequency.

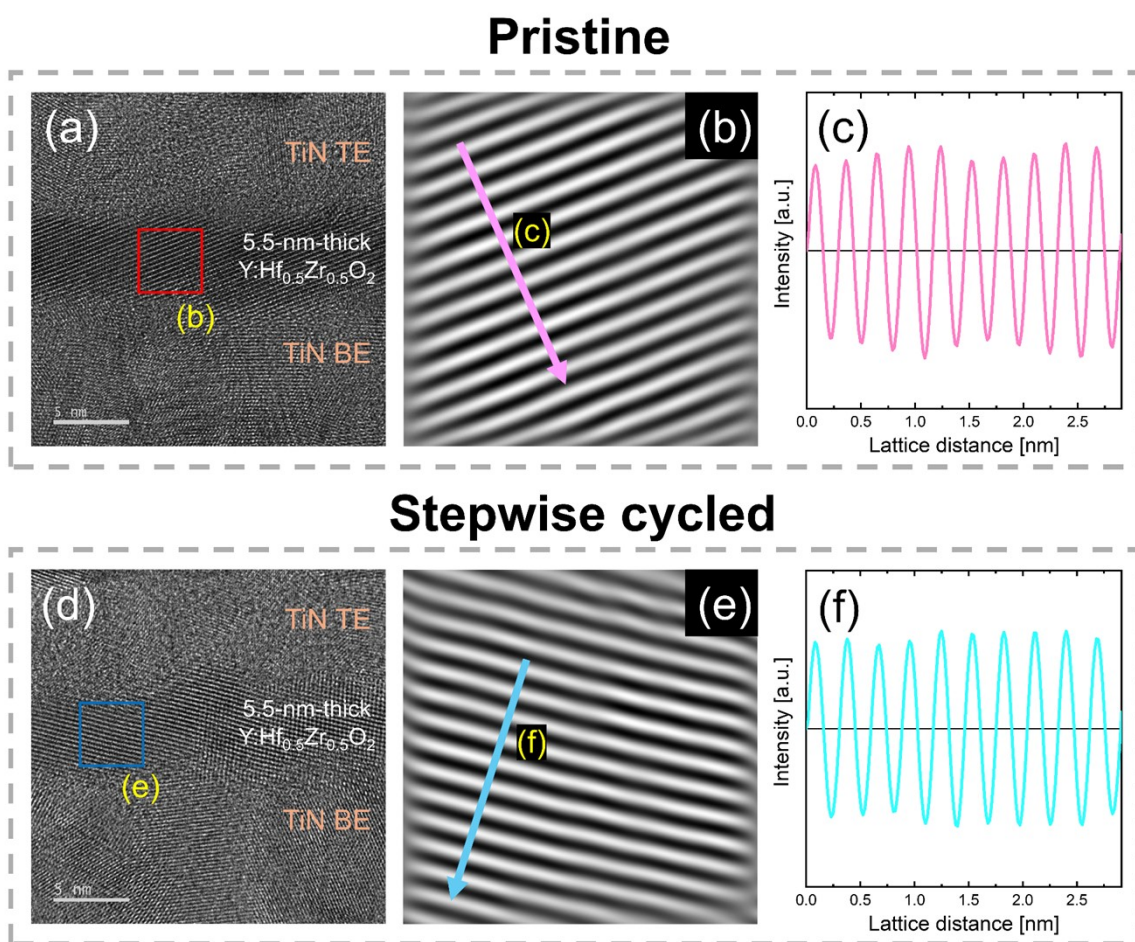

**Figure S10.** The Cs-TEM images of the 5.5-nm-thick  $\text{Y:Hf}_{0.5}\text{Zr}_{0.5}\text{O}_2$  capacitor at the (a) pristine state and (d) after stepwise cycling. The iFFT images for the regions marked with (b) red (pristine) and (e) blue (stepwise cycled) boxes, respectively. The line maps along the (c) pink (pristine) and (f) sky blue (stepwise cycled) arrows, respectively.

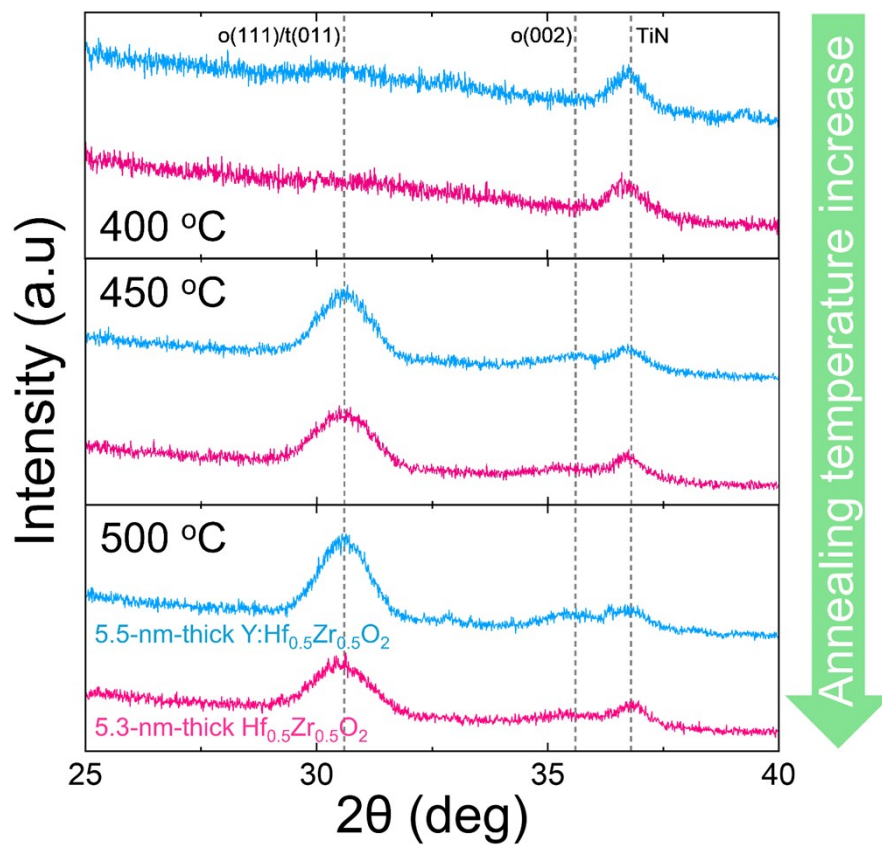

**Figure S11.** GIXRD patterns (incident angle:  $0.5^\circ$ ) of the 5.3-nm-thick  $\text{Hf}_{0.5}\text{Zr}_{0.5}\text{O}_2$  (pink) and 5.5-nm-thick  $\text{Y:Hf}_{0.5}\text{Zr}_{0.5}\text{O}_2$  (sky blue) films, PMA-treated at 400 °C, 450 °C, and 500 °C, respectively, for 30 seconds.

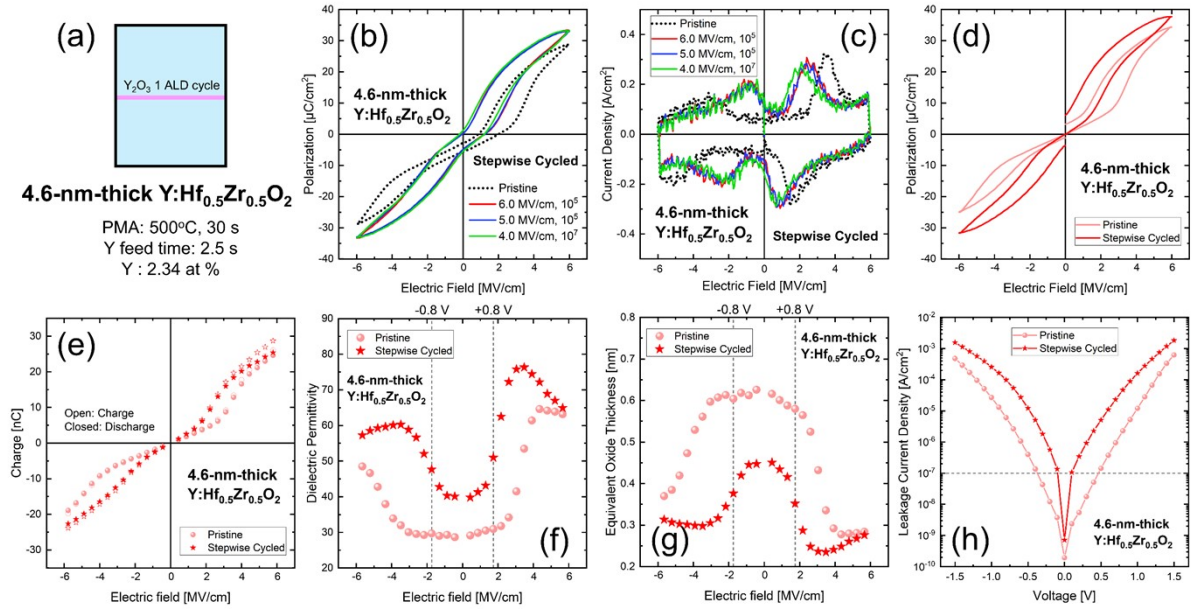

**Figure S12.** (a) The PMA, Y feeding time, and Y atomic concentration information of the 4.6-nm-thick  $Y:Hf_{0.5}Zr_{0.5}O_2$ . The (b) P-E and (c) I-E curve changes of the 4.6-nm-thick  $Y:Hf_{0.5}Zr_{0.5}O_2$  with stepwise cycling, with cycling sequences of  $E_{cycle} = 6.0 \text{ MV cm}^{-1}$ ,  $10^5$  cycles  $\rightarrow E_{cycle} = 5.0 \text{ MV cm}^{-1}$ ,  $10^5$  cycles  $\rightarrow E_{cycle} = 4.0 \text{ MV cm}^{-1}$ ,  $10^7$  cycles. The (d) non-switching P-E curves, (e)  $Q_c$  (open) and  $Q_d$  (closed) characteristics, (f)  $k$ -E curves, (g) EOT-E curves, and (h) J-V curves of the 4.6-nm-thick  $Y:Hf_{0.5}Zr_{0.5}O_2$ , respectively, at the pristine state and after stepwise cycling.



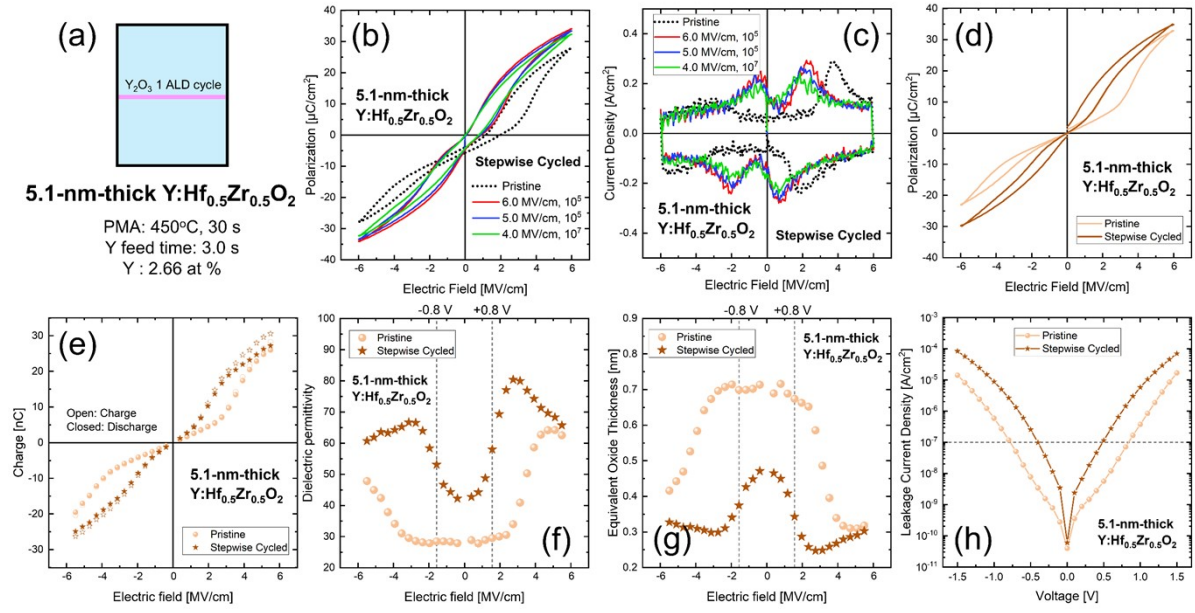

**Figure S13.** (a) The PMA, Y feeding time, and Y atomic concentration information of the 5.1-nm-thick  $\text{Y:Hf}_{0.5}\text{Zr}_{0.5}\text{O}_2$ . The (b) P-E and (c) I-E curve changes of the 5.1-nm-thick  $\text{Y:Hf}_{0.5}\text{Zr}_{0.5}\text{O}_2$  with stepwise cycling, with cycling sequences of  $E_{\text{cycle}} = 6.0 \text{ MV cm}^{-1}$ ,  $10^5$  cycles  $\rightarrow E_{\text{cycle}} = 5.0 \text{ MV cm}^{-1}$ ,  $10^5$  cycles  $\rightarrow E_{\text{cycle}} = 4.0 \text{ MV cm}^{-1}$ ,  $10^7$  cycles. The (d) non-switching P-E curves, (e)  $Q_c$  (open) and  $Q_d$  (closed) characteristics, (f)  $k$ -E curves, (g) EOT-E curves, and (h) J-V curves of the 5.1-nm-thick  $\text{Y:Hf}_{0.5}\text{Zr}_{0.5}\text{O}_2$ , respectively, at the pristine state and after stepwise cycling.

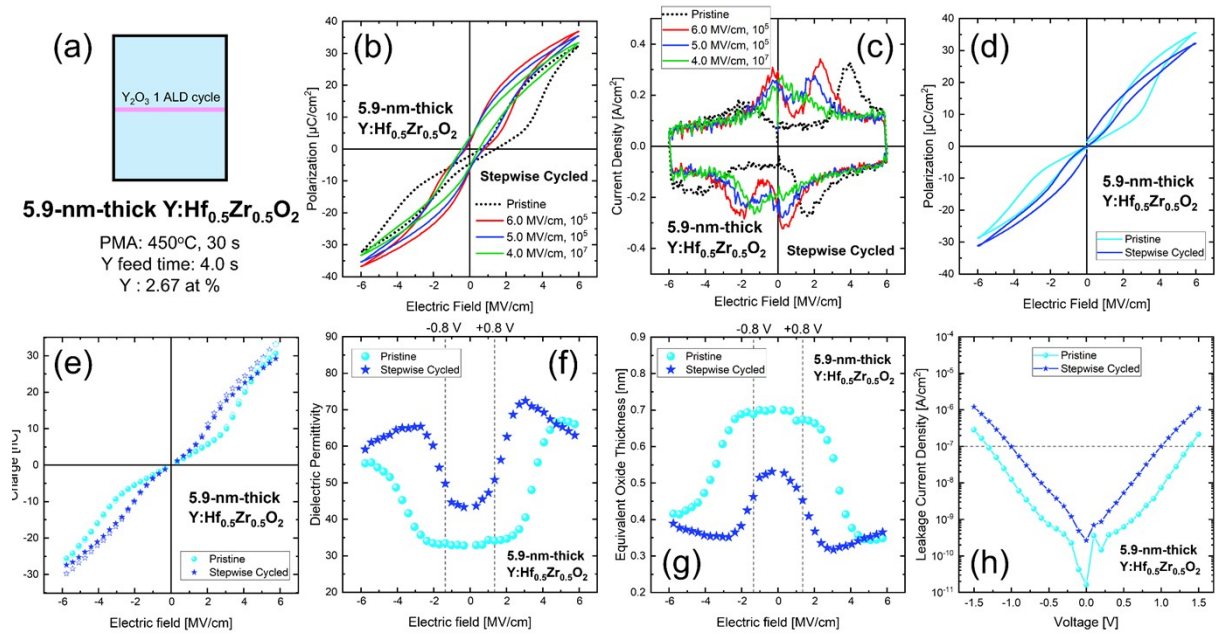

**Figure S14.** (a) The PMA, Y feeding time, and Y atomic concentration information of the 5.9-nm-thick  $\text{Y:Hf}_{0.5}\text{Zr}_{0.5}\text{O}_2$ . The (b) P-E and (c) I-E curve changes of the 5.9-nm-thick  $\text{Y:Hf}_{0.5}\text{Zr}_{0.5}\text{O}_2$  with stepwise cycling, with cycling sequences of  $E_{\text{cycle}} = 6.0 \text{ MV cm}^{-1}, 10^5 \text{ cycles} \rightarrow E_{\text{cycle}} = 5.0 \text{ MV cm}^{-1}, 10^5 \text{ cycles} \rightarrow E_{\text{cycle}} = 4.0 \text{ MV cm}^{-1}, 10^7 \text{ cycles}$ . The (d) non-switching P-E curves, (e)  $Q_c$  (open) and  $Q_d$  (closed) characteristics, (f)  $k$ -E curves, (g) EOT-E curves, and (h) J-V curves of the 5.9-nm-thick  $\text{Y:Hf}_{0.5}\text{Zr}_{0.5}\text{O}_2$ , respectively, at the pristine state and after stepwise cycling.



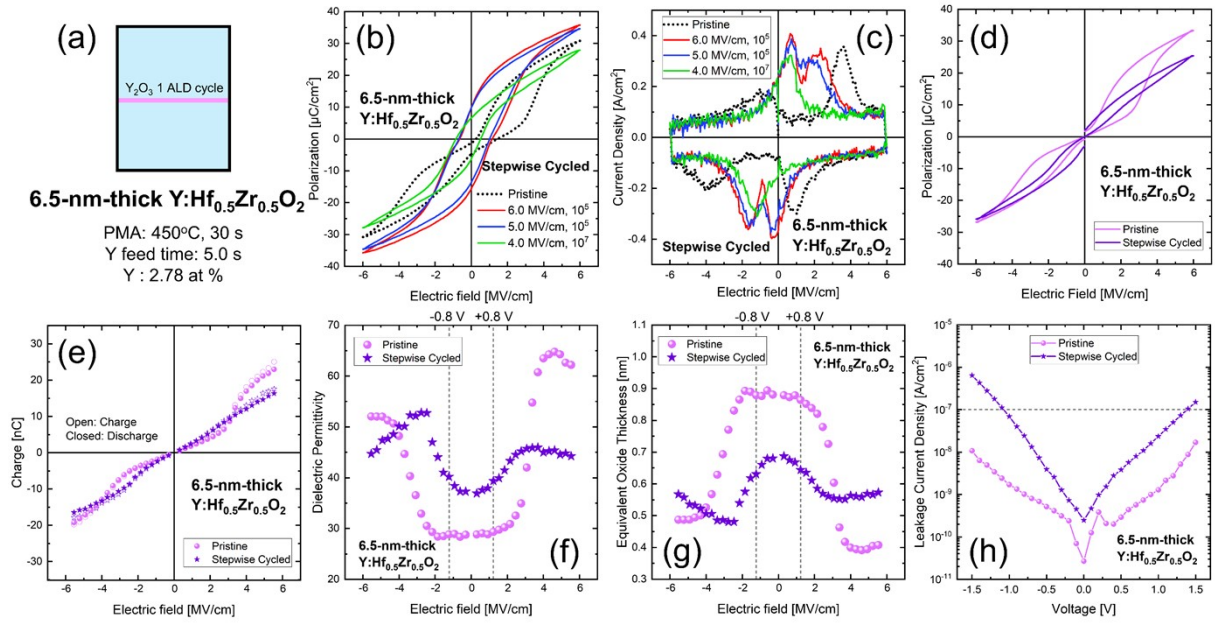

**Figure S15.** (a) The PMA, Y feeding time, and Y atomic concentration information of the 6.5-nm-thick  $\text{Y:Hf}_{0.5}\text{Zr}_{0.5}\text{O}_2$ . The (b) P-E and (c) I-E curve changes of the 6.5-nm-thick  $\text{Y:Hf}_{0.5}\text{Zr}_{0.5}\text{O}_2$  with stepwise cycling, with cycling sequences of  $E_{\text{cycle}} = 6.0 \text{ MV cm}^{-1}$ ,  $10^5$  cycles  $\rightarrow E_{\text{cycle}} = 5.0 \text{ MV cm}^{-1}$ ,  $10^5$  cycles  $\rightarrow E_{\text{cycle}} = 4.0 \text{ MV cm}^{-1}$ ,  $10^7$  cycles. The (d) non-switching P-E curves, (e)  $Q_c$  (open) and  $Q_d$  (closed) characteristics, (f)  $k$ -E curves, (g) EOT-E curves, and (h) J-V curves of the 6.5-nm-thick  $\text{Y:Hf}_{0.5}\text{Zr}_{0.5}\text{O}_2$ , respectively, at the pristine state and after stepwise cycling.

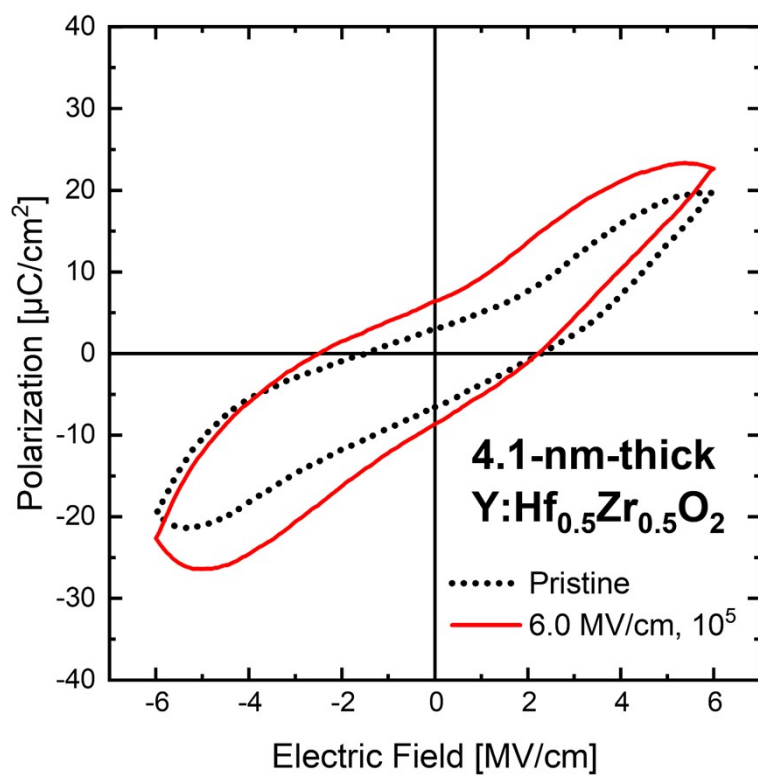

**Figure S16.** P-E curve changes of the 4.1-nm-thick Y:Hf<sub>0.5</sub>Zr<sub>0.5</sub>O<sub>2</sub> film with field-cycling at  $6.0 \text{ MV cm}^{-1}$  for  $10^5$  cycles.

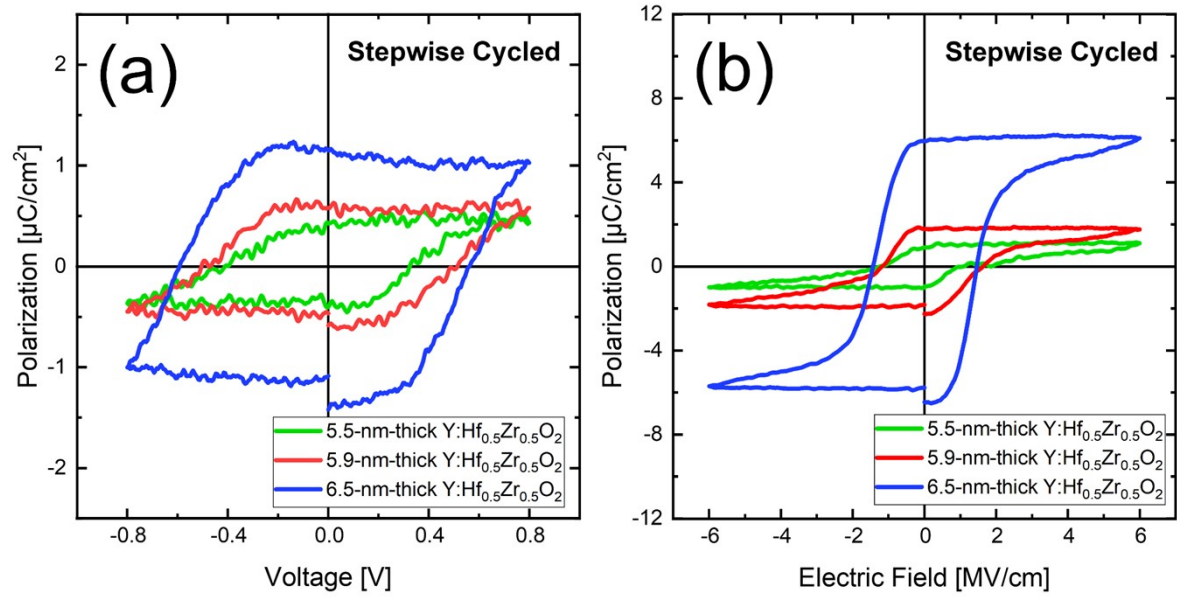

**Figure S17.** PUND P-V curves of the 5.5-nm, 5.9-nm, and 6.5-nm-thick Y: Hf<sub>0.5</sub>Zr<sub>0.5</sub>O<sub>2</sub> films after stepwise cycling, adopting (a) 0.8 V and (b) 6 MV cm<sup>-1</sup> triangular pulses, respectively, with 1 kHz frequency.

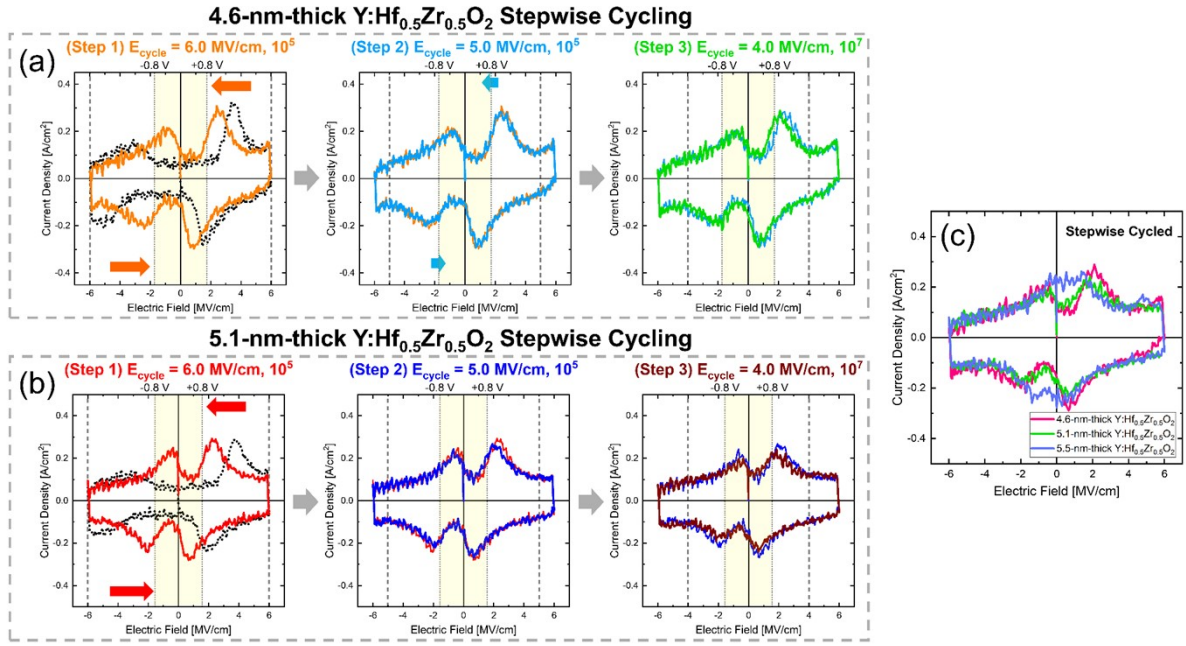

**Figure S18.** I-E curve changes of the (a) 4.6-nm-thick Y:Hf<sub>0.5</sub>Zr<sub>0.5</sub>O<sub>2</sub> and (b) 5.1-nm-thick Y:Hf<sub>0.5</sub>Zr<sub>0.5</sub>O<sub>2</sub> films with stepwise cycling after sequential cycling steps of (step 1)  $E_{\text{cycle}} = 6.0 \text{ MV cm}^{-1}$ ,  $10^5$  cycles  $\rightarrow$  (step 2)  $E_{\text{cycle}} = 5.0 \text{ MV cm}^{-1}$ ,  $10^5$  cycles  $\rightarrow$  (step 3)  $E_{\text{cycle}} = 4.0 \text{ MV cm}^{-1}$ ,  $10^7$  cycles. (c) The I-E curves of the 4.6-nm, 5.1-nm, and 5.5-nm-thick Y:Hf<sub>0.5</sub>Zr<sub>0.5</sub>O<sub>2</sub> films after stepwise cycling.

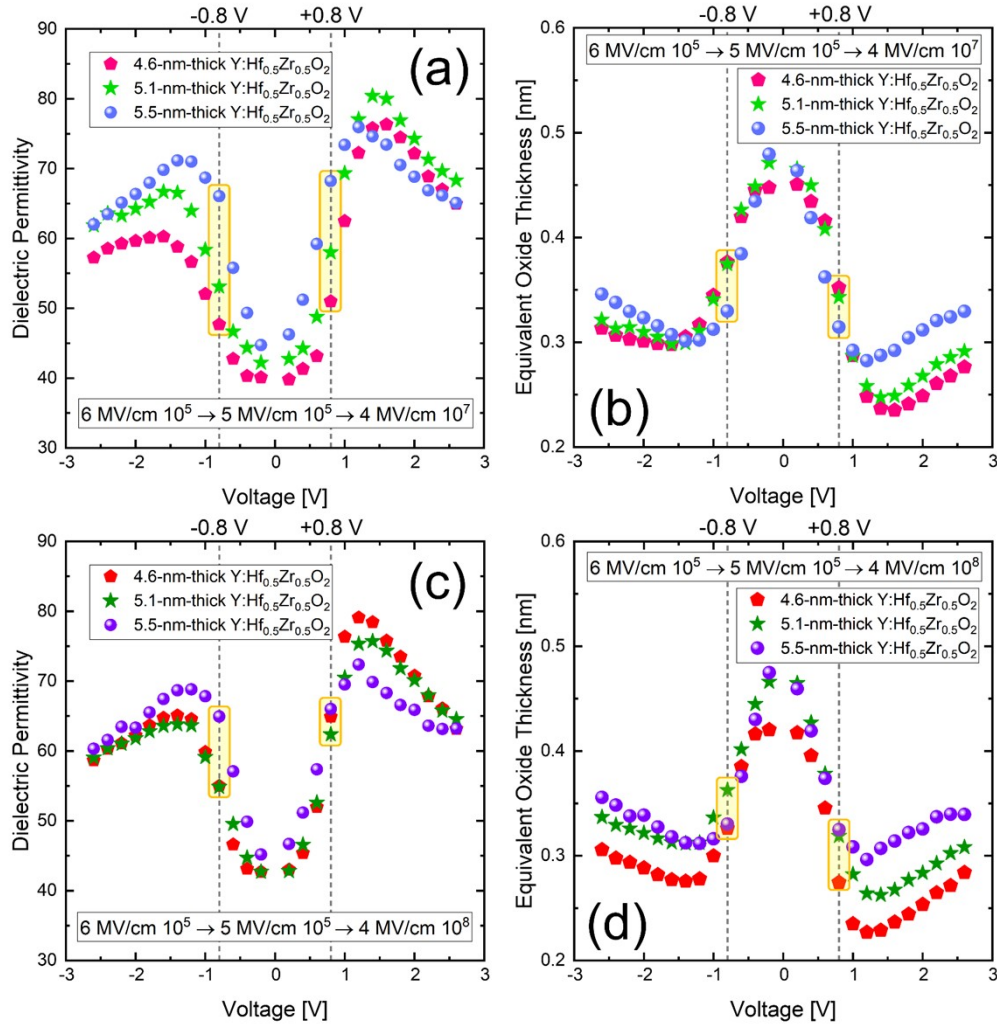

**Figure S19.** The (a)  $k$ -E and (b) EOT-E curves of the 4.6-nm, 5.1-nm, and 5.5-nm-thick  $\text{Y:Hf}_{0.5}\text{Zr}_{0.5}\text{O}_2$  films after stepwise cycling with sequential cycling steps of  $E_{\text{cycle}} = 6.0 \text{ MV cm}^{-1}$ ,  $10^5 \text{ cycles} \rightarrow E_{\text{cycle}} = 5.0 \text{ MV cm}^{-1}$ ,  $10^5 \text{ cycles} \rightarrow E_{\text{cycle}} = 4.0 \text{ MV cm}^{-1}$ ,  $10^7 \text{ cycles}$ . The (c)  $k$ -E and (d) EOT-E curves of the 4.6-nm, 5.1-nm, and 5.5-nm-thick  $\text{Y:Hf}_{0.5}\text{Zr}_{0.5}\text{O}_2$  films after stepwise cycling with sequential cycling steps of  $E_{\text{cycle}} = 6.0 \text{ MV cm}^{-1}$ ,  $10^5 \text{ cycles} \rightarrow E_{\text{cycle}} = 5.0 \text{ MV cm}^{-1}$ ,  $10^5 \text{ cycles} \rightarrow E_{\text{cycle}} = 4.0 \text{ MV cm}^{-1}$ ,  $10^8 \text{ cycles}$ .

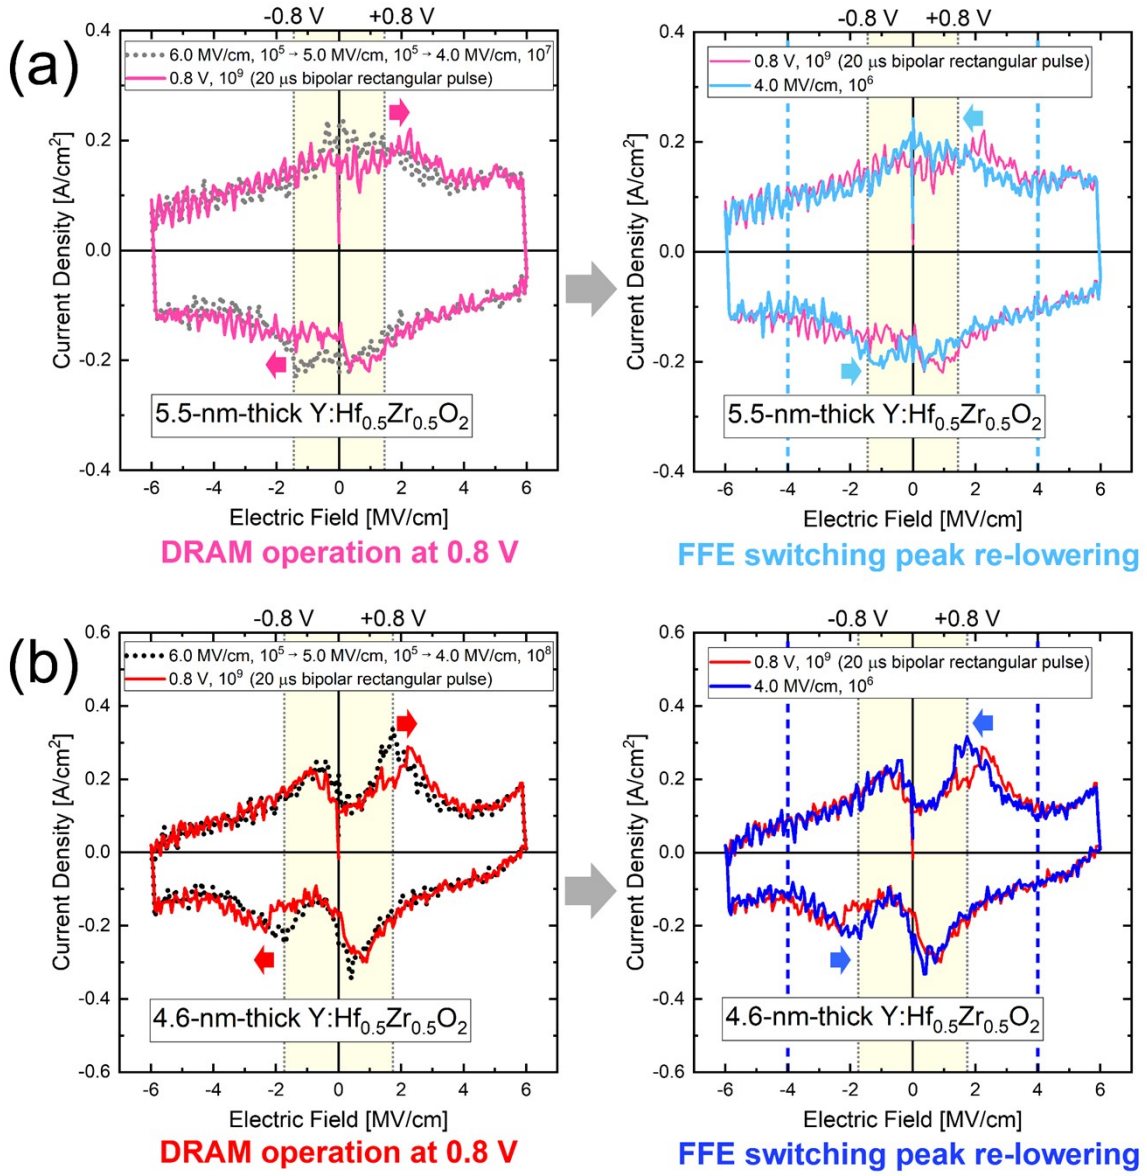

**Figure S20.** (a) I-E curve changes of the 5.5-nm-thick Y:Hf<sub>0.5</sub>Zr<sub>0.5</sub>O<sub>2</sub> film stepwise cycled with sequential cycling steps of 100 kHz bipolar triangular pulses at  $E_{\text{cycle}} = 6.0 \text{ MV cm}^{-1}$ ,  $10^5$  cycles  $\rightarrow E_{\text{cycle}} = 5.0 \text{ MV cm}^{-1}$ ,  $10^5$  cycles  $\rightarrow E_{\text{cycle}} = 4.0 \text{ MV cm}^{-1}$ ,  $10^7$  cycles (dotted grey). Subsequently, bipolar rectangular pulses of 0.8 V with 20 μs width were applied for  $10^9$  cycles (pink), followed by 100 kHz bipolar triangular pulses at  $4.0 \text{ MV cm}^{-1}$ ,  $10^6$  cycles (sky blue). (b) I-E curve changes of the 4.6-nm-thick Y:Hf<sub>0.5</sub>Zr<sub>0.5</sub>O<sub>2</sub> film stepwise cycled with sequential cycling steps of 100 kHz bipolar triangular pulses at  $E_{\text{cycle}} = 6.0 \text{ MV cm}^{-1}$ ,  $10^5$  cycles  $\rightarrow E_{\text{cycle}} = 5.0 \text{ MV cm}^{-1}$ ,  $10^5$  cycles  $\rightarrow E_{\text{cycle}} = 4.0 \text{ MV cm}^{-1}$ ,  $10^8$  cycles (dotted black). Subsequently, bipolar rectangular pulses of 0.8 V with 20 μs width were applied for  $10^9$  cycles (red), followed by 100 kHz bipolar triangular pulses at  $4.0 \text{ MV cm}^{-1}$ ,  $10^6$  cycles (blue).



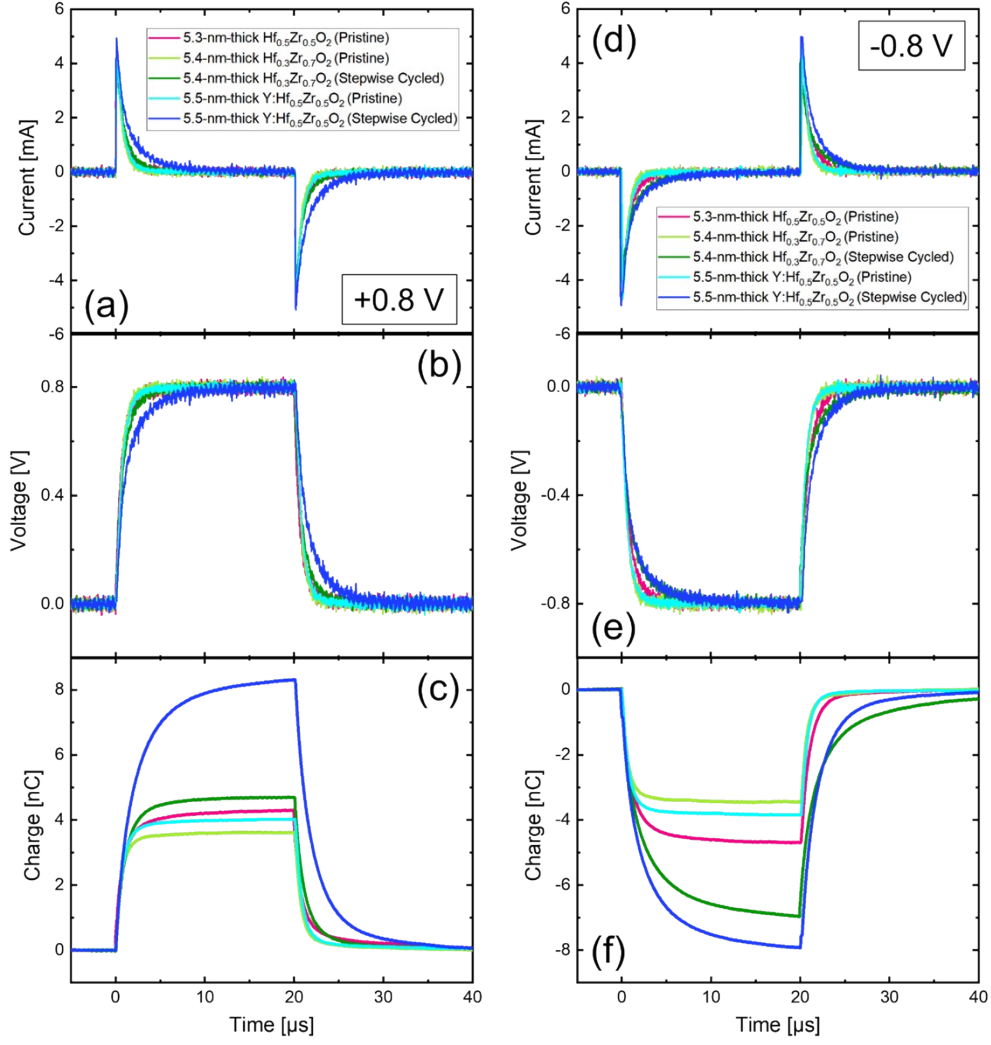

**Figure S21.** The transient (a) current-time, (b) voltage-time, and (c) charge-time curves of the 5.3-nm-thick Hf<sub>0.5</sub>Zr<sub>0.5</sub>O<sub>2</sub> (pristine), 5.4-nm-thick Hf<sub>0.3</sub>Zr<sub>0.7</sub>O<sub>2</sub> (pristine and stepwise cycled), and 5.5-nm-thick Y:Hf<sub>0.5</sub>Zr<sub>0.5</sub>O<sub>2</sub> (pristine and stepwise cycled) films, respectively, under a rectangular applied pulse with a +0.8 V height and a 20 μs length. The transient (d) current-time, (e) voltage-time, and (f) charge-time curves of the 5.3-nm-thick Hf<sub>0.5</sub>Zr<sub>0.5</sub>O<sub>2</sub> (pristine), 5.4-nm-thick Hf<sub>0.3</sub>Zr<sub>0.7</sub>O<sub>2</sub> (pristine and stepwise cycled), and 5.5-nm-thick Y:Hf<sub>0.5</sub>Zr<sub>0.5</sub>O<sub>2</sub> (pristine and stepwise cycled) films, respectively, under a rectangular applied pulse with a -0.8 V height and a 20 μs length.

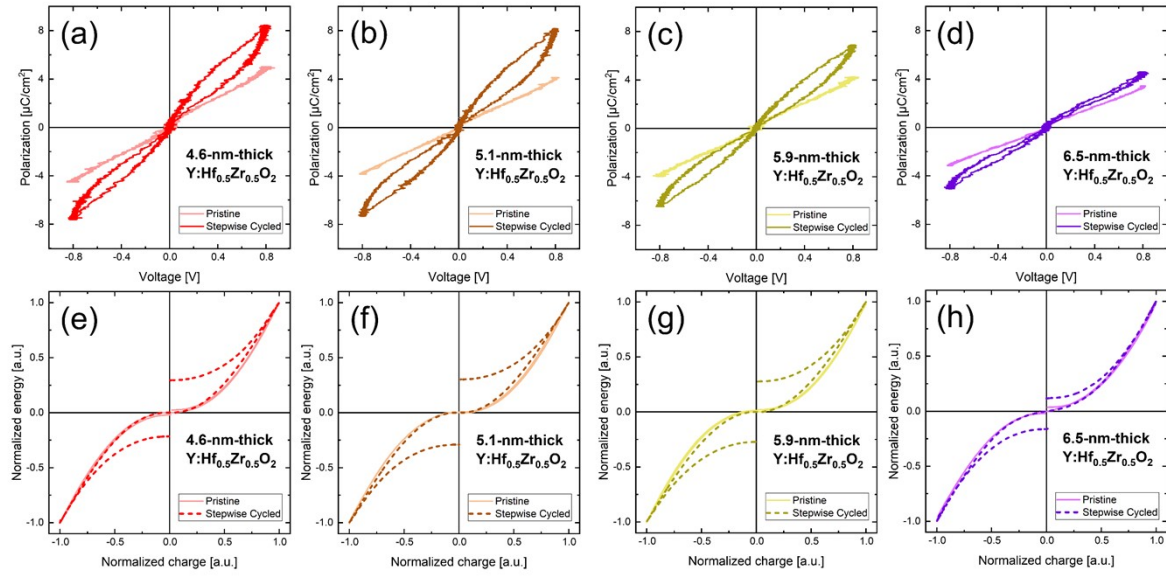

**Figure S22.** The calculated polarization-voltage curves of the (a) 4.6-nm, (b) 5.1-nm, (c) 5.9-nm, and (d) 6.5-nm-thick  $\text{Y:Hf}_{0.5}\text{Zr}_{0.5}\text{O}_2$  films, respectively, at the pristine state and after stepwise cycling. The normalized energy-charge curves during charging and discharging of the (a) 4.6-nm, (b) 5.1-nm, (c) 5.9-nm, and (d) 6.5-nm-thick  $\text{Y:Hf}_{0.5}\text{Zr}_{0.5}\text{O}_2$  films, respectively, at the pristine state and after stepwise cycling.



**Table S1.** The energy loss values of the 4.6-nm, 5.1-nm, 5.9-nm, and 6.5-nm-thick Y:Hf<sub>0.5</sub>Zr<sub>0.5</sub>O<sub>2</sub> films for the pristine state and after stepwise cycling at  $\pm 0.8$  V.

|                    |        | 4.6-nm-thick<br>Y:Hf <sub>0.5</sub> Zr <sub>0.5</sub> O <sub>2</sub> |                    | 5.1-nm-thick<br>Y:Hf <sub>0.5</sub> Zr <sub>0.5</sub> O <sub>2</sub> |                    | 5.9-nm-thick<br>Y:Hf <sub>0.5</sub> Zr <sub>0.5</sub> O <sub>2</sub> |                    | 6.5-nm-thick<br>Y:Hf <sub>0.5</sub> Zr <sub>0.5</sub> O <sub>2</sub> |                    |
|--------------------|--------|----------------------------------------------------------------------|--------------------|----------------------------------------------------------------------|--------------------|----------------------------------------------------------------------|--------------------|----------------------------------------------------------------------|--------------------|
|                    |        | Pristine                                                             | Stepwise<br>cycled | Pristine                                                             | Stepwise<br>cycled | Pristine                                                             | Stepwise<br>cycled | Pristine                                                             | Stepwise<br>cycled |
| Energy<br>loss (%) | +0.8 V | 2.2                                                                  | 29.4               | 0.5                                                                  | 30.2               | 2.0                                                                  | 27.6               | 3.4                                                                  | 11.4               |
|                    | -0.8 V | 1.7                                                                  | 21.5               | 0.0                                                                  | 29.1               | 1.4                                                                  | 27.2               | 2.0                                                                  | 15.9               |

## References

1. J. Shin, H. Seo, K. H. Ye, Y. H. Jang, D. S. Kwon, J. Lim, T. K. Kim, H. Paik, H. Song and H. N. Kim, *J. Mater. Chem. C*, 2024, **12**, 5035-5046.
2. M. H. Park, H. J. Kim, Y. J. Kim, T. Moon and C. S. Hwang, *Appl. Phys. Lett.*, 2014, **104**.
3. H. J. Kim, M. H. Park, Y. J. Kim, Y. H. Lee, W. Jeon, T. Gwon, T. Moon, K. D. Kim and C. S. Hwang, *Appl. Phys. Lett.*, 2014, **105**.
4. M. H. Park, H. J. Kim, Y. J. Kim, Y. H. Lee, T. Moon, K. D. Kim, S. D. Hyun and C. S. Hwang, *Appl. Phys. Lett.*, 2015, **107**.
5. M. H. Park, T. Schenk, C. M. Fancher, E. D. Grimley, C. Zhou, C. Richter, J. M. LeBeau, J. L. Jones, T. Mikolajick and U. Schroeder, *J. Mater. Chem. C*, 2017, **5**, 4677-4690.
6. M. H. Park, C. C. Chung, T. Schenk, C. Richter, K. Opsomer, C. Detavernier, C. Adelman, J. L. Jones, T. Mikolajick and U. Schroeder, *Adv. Electron. Mater.*, 2018, **4**, 1800091.
7. Y. H. Lee, H. J. Kim, T. Moon, K. Do Kim, S. D. Hyun, H. W. Park, Y. B. Lee, M. H. Park and C. S. Hwang, *Nanotechnology*, 2017, **28**, 305703.
8. W. Hamouda, A. Pancotti, C. Lubin, L. Torte, C. Richter, T. Mikolajick, U. Schroeder and N. Barrett, *J. Appl. Phys.*, 2020, **127**.
9. M. Materano, P. D. Lomenzo, A. Kersch, M. H. Park, T. Mikolajick and U. Schroeder, *Inorg. Chem. Front.*, 2021, **8**, 2650-2672.
10. T. Mittmann, T. Szyjka, H. Alex, M. C. Istrate, P. D. Lomenzo, L. Baumgarten, M. Müller, J. L. Jones, L. Pintilie and T. Mikolajick, *Phys. Status Solidi - Rapid Res. Lett.*, 2021, **15**, 2100012.
11. U. Schroeder, M. H. Park, T. Mikolajick and C. S. Hwang, *Nat. Rev. Mater.*, 2022, **7**, 653-669.
